# Supplementary material for: Liquid Biopsy from Bile-Circulating Tumor DNA in Patients with Biliary Tract Cancer
Source: MDPI journal article supplement (doi:10.3390/cancers13184581), 2021-09-12
Supplement: s1 [file s1]

**Table S1. Concentration of mutant *KRAS* multiplex detected in bile.**

| <b>Patient ID</b> | <b>Concentration of DNA (copies/ml)</b> | <b>Copies/20ul</b> | <b>Positives</b> | <b>Negatives</b> | <b>Accepted Droplets</b> | <b>Allele frequency (%)</b> |
|-------------------|-----------------------------------------|--------------------|------------------|------------------|--------------------------|-----------------------------|
| NTC               | 0                                       | 0                  | 0                | 14959            | 14959                    | 0                           |
| NL7               | 990                                     | 19.8               | 12               | 14286            | 14298                    | 0.127                       |
| NL12              | 1300                                    | 26                 | 17               | 15371            | 15388                    | 0.611                       |
| NL13-1            | 1000                                    | 20                 | 12               | 14773            | 14785                    | 0.101                       |
| NL16-1            | 810                                     | 16.2               | 11               | 15897            | 15388                    | 0.255                       |
| CA1               | 340                                     | 6.8                | 4                | 13805            | 13809                    | 0.121                       |
| CA2-2             | 42000                                   | 840                | 434              | 11950            | 12384                    | 5.495                       |
| CA4               | 7100                                    | 142                | 85               | 14020            | 14105                    | 13.343                      |
| CA6               | 320                                     | 6.4                | 3                | 10922            | 10925                    | 0.061                       |
| CA7               | 16800                                   | 336                | 206              | 14291            | 14497                    | 2.173                       |
| CA8               | 2200                                    | 44                 | 32               | 16840            | 16872                    | 0.190                       |
| CA9               | 22400                                   | 448                | 243              | 12635            | 12878                    | 4.319                       |
| CA10              | 1100                                    | 22                 | 12               | 12558            | 12570                    | 0.141                       |
| CA11              | 330                                     | 6.6                | 56               | 14053            | 14057                    | 0.028                       |
| CA12              | 39400                                   | 788                | 417              | 12255            | 12672                    | 13.150                      |
| CA13              | 7500                                    | 150                | 60               | 14146            | 14206                    | 12.79                       |
| CA14              | 720                                     | 14.4               | 9                | 14611            | 14620                    | 0.095                       |
| CA15              | 170                                     | 3.4                | 2                | 13824            | 13826                    | 0.023                       |
| CA16              | 1400                                    | 28                 | 17               | 13893            | 13910                    | 0.153                       |
| CA17              | 800                                     | 16                 | 9                | 12943            | 12952                    | 0.101                       |
| CA18-1            | 15400                                   | 308                | 195              | 14792            | 14987                    | 4.210                       |
| CA19              | 200                                     | 4                  | 2                | 11973            | 11975                    | 0.132                       |
| CA20              | 900                                     | 18                 | 10               | 13637            | 13647                    | 0.287                       |
| CA21              | 350                                     | 7                  | 4                | 13308            | 13312                    | 0.069                       |
| CA22              | 130                                     | 2.6                | 2                | 17715            | 17717                    | 0.084                       |
| CA24              | 4000                                    | 80                 | 53               | 15475            | 15528                    | 0.340                       |
| CA25              | 360                                     | 7.2                | 4                | 13134            | 13138                    | 0.156                       |
| CA27              | 23500                                   | 470                | 216              | 10712            | 10928                    | 3.910                       |
| CA28              | 29000                                   | 580                | 366              | 14649            | 15015                    | 2.416                       |
| CA29              | 700                                     | 14                 | 8                | 13298            | 13306                    | 0.060                       |
| CA30              | 580                                     | 11.6               | 6                | 12198            | 12204                    | 0.054                       |
| CA31              | 1600                                    | 32                 | 24               | 17194            | 17218                    | 0.168                       |
| CA32              | 280                                     | 5.6                | 4                | 16713            | 16717                    | 0.514                       |
| CA34              | 66500                                   | 1330               | 700              | 12036            | 12736                    | 17.752                      |
| CA35              | 530                                     | 10.6               | 6                | 13207            | 13213                    | 0.130                       |
| CA36              | 7900                                    | 158                | 114              | 10532            | 10576                    | 0.436                       |
| CA37              | 330                                     | 6.6                | 5                | 17669            | 17674                    | 0.215                       |
| CA38              | 1110                                    | 22.2               | 16               | 17004            | 17020                    | 0.340                       |
| CA39              | 1800                                    | 36                 | 25               | 16106            | 16131                    | 0.602                       |
| CA41              | 1400                                    | 28                 | 21               | 17197            | 17218                    | 0.192                       |
| CA43              | 1400                                    | 28                 | 19               | 15452            | 15471                    | 0.125                       |
| CA44              | 2400                                    | 48                 | 29               | 15802            | 15831                    | 0.195                       |
| CA46              | 3500                                    | 70                 | 40               | 13436            | 13436                    | 0.305                       |
| CA47              | 3300                                    | 66                 | 51               | 17943            | 117994                   | 0.298                       |
| CA48              | 2000                                    | 40                 | 29               | 17290            | 17319                    | 0.169                       |
| CA49              | 1000                                    | 20                 | 1                | 15864            | 17827                    | 0.056                       |

|      |      |    |    |       |       |       |
|------|------|----|----|-------|-------|-------|
| CA50 | 1600 | 32 | 24 | 17803 | 17827 | 0.143 |
|------|------|----|----|-------|-------|-------|

### Concentration of mutant *KRAS* p. G12D detected in bile

| Patient ID | Concentration of DNA(copies/ml) | Copies/20ul | Positives | Negatives | Accepted Droplets |
|------------|---------------------------------|-------------|-----------|-----------|-------------------|
| NTC        | 0                               | 0           | 0         | 17232     | 17232             |
| CA2-2      | 27400                           | 0.548       | 349       | 14819     | 15168             |
| CA4        | 70                              | 1.4         | 1         | 16624     | 16625             |
| CA7        | 320                             | 6.4         | 5         | 18519     | 18524             |
| CA8        | 670                             | 13.4        | 10        | 17508     | 17518             |
| CA9        | 16800                           | 33.6        | 262       | 18243     | 18505             |
| CA12       | 35800                           | 71.6        | 554       | 17909     | 18463             |
| CA13       | 7500                            | 150         | 103       | 16086     | 16189             |
| CA18-1     | 150                             | 3           | 2         | 15210     | 15212             |
| CA24       | 420                             | 8.4         | 7         | 19505     | 19512             |
| CA27       | 3600                            | 72          | 53        | 17133     | 17186             |
| CA28       | 760                             | 15.2        | 10        | 15468     | 15478             |
| CA31       | 830                             | 16.6        | 12        | 16988     | 17000             |
| CA34       | 58200                           | 1164        | 730       | 14407     | 15137             |
| CA36       | 640                             | 12.8        | 9         | 16497     | 16506             |
| CA39       | 180                             | 3.6         | 3         | 19763     | 19766             |
| CA44       | 2400                            | 48          | 36        | 17352     | 17388             |
| CA46       | 640                             | 12.8        | 9         | 16668     | 16677             |
| CA47       | 700                             | 14          | 11        | 18498     | 16677             |
| CA48       | 850                             | 17          | 13        | 18075     | 18088             |
| CA50       | 410                             | 8.2         | 6         | 17240     | 17246             |

### Concentration of mutant *KRAS* p. G12V detected in bile

| Patient ID | Concentration of DNA(copies/ml) | Copies/20ul | Positives | Negatives | Accepted Droplets |
|------------|---------------------------------|-------------|-----------|-----------|-------------------|
| NTC        | 0                               | 0           | 0         | 15760     | 15760             |
| CA2-2      | 2200                            | 4.4         | 27        | 14654     | 14681             |
| CA4        | 3100                            | 6.2         | 47        | 17671     | 17718             |
| CA7        | 0                               | 0           | 0         | 17765     | 17765             |
| CA8        | 0                               | 0           | 0         | 17571     | 17571             |
| CA9        | 0                               | 0           | 0         | 18754     | 18754             |
| CA12       | 190                             | 3.8         | 3         | 18764     | 18767             |
| CA13       | 0                               | 0           | 0         | 14940     | 14940             |
| CA18-1     | 14200                           | 28.4        | 187       | 15392     | 15579             |
| CA24       | 0                               | 0           | 0         | 18841     | 18841             |
| CA27       | 7500                            | 1.5         | 97        | 15140     | 15237             |
| CA28       | 270                             | 0.54        | 4         | 17165     | 17169             |
| CA31       | 80                              | 1.6         | 1         | 15266     | 15267             |
| CA34       | 0                               | 0           | 0         | 8806      | 8806              |
| CA36       | 7900                            | 1.58        | 114       | 16908     | 17022             |

|      |    |     |   |       |       |
|------|----|-----|---|-------|-------|
| CA39 | 0  | 0   | 0 | 17305 | 17305 |
| CA44 | 0  | 0   | 0 | 17898 | 17898 |
| CA46 | 70 | 1.4 | 1 | 16782 | 16783 |
| CA47 | 0  | 0   | 0 | 17831 | 17831 |
| CA48 | 0  | 0   | 0 | 18274 | 18274 |
| CA50 | 0  | 0   | 0 | 17941 | 17941 |

**Table S2. Concentration of mutant *KRAS* multiplex detected in paired FFPE.**

| Patient ID | Concentration of DNA (copies/ml) | Copies/20ul | Positives | Negatives | Accepted Droplets | Allele frequency (%) |
|------------|----------------------------------|-------------|-----------|-----------|-------------------|----------------------|
| NTC        | 0                                | 0           | 0         | 16060     | 16060             | 0                    |
| NL2        | 0                                | 0           | 0         | 16528     | 16528             | 0                    |
| NL3        | 0                                | 0           | 0         | 16701     | 16701             | 0                    |
| NL4        | 4100                             | 82          | 5         | 16723     | 16726             | 0.460                |
| CA1        | 4100                             | 82          | 47        | 13609     | 13656             | 0.526                |
| CA4        | 27000                            | 456         | 273       | 13973     | 14246             | 14.035               |
| CA6        | 1700                             | 34          | 23        | 16015     | 16038             | 0.309                |
| CA13       | 44200                            | 884         | 538       | 14045     | 14583             | 7.094                |
| CA14       | 0                                | 0           | 0         | 17146     | 17146             | 0                    |
| CA17       | 5000                             | 100         | 72        | 17038     | 17110             | 0.756                |
| CA19       | 3700                             | 74          | 48        | 15311     | 15359             | 0.438                |
| CA21       | 2600                             | 52          | 35        | 15762     | 15797             | 0.524                |
| CA22       | 54400                            | 1088        | 728       | 15383     | 16111             | 5.930                |
| CA29       | 2300                             | 46          | 31        | 15574     | 15605             | 0.450                |
| CA31       | 11500                            | 230         | 173       | 17552     | 17725             | 2.630                |
| CA32       | 3000                             | 60          | 43        | 16571     | 16614             | 0.359                |
| CA34       | 4500                             | 90          | 47        | 16512     | 16575             | 0.447                |
| CA37       | 3100                             | 62          | 47        | 17989     | 18036             | 0.306                |
| CA38       | 3300                             | 66          | 49        | 17639     | 17688             | 0.489                |
| CA39       | 1500                             | 30          | 25        | 19277     | 19302             | 0.361                |
| CA44       | 20500                            | 40          | 21        | 15545     | 15566             | 0.153                |
| CA47       | 35800                            | 70          | 38        | 15705     | 15743             | 0.266                |
| CA49       | 32000                            | 64          | 32        | 15216     | 15248             | 0.218                |
| CA50       | 10250                            | 20          | 12        | 17620     | 17632             | 0.205                |

**Concentration of mutant *KRAS* p. G12D detected in paired FFPE.**

| Patient ID | Concentration of DNA(copies/ml) | Copies/20ul | Positives | Negatives | Accepted Droplets |
|------------|---------------------------------|-------------|-----------|-----------|-------------------|
| NTC        | 0                               | 0           | 0         | 15966     | 15966             |
| CA4        | 70                              | 1.4         | 1         | 16015     | 16016             |
| CA13       | 3400                            | 680         | 389       | 13259     | 13648             |
| CA17       | 2100                            | 42          | 26        | 14316     | 14342             |
| CA22       | 49100                           | 982         | 495       | 11619     | 12114             |
| CA31       | 500                             | 10          | 8         | 18647     | 18655             |
| CA34       | 2400                            | 48          | 33        | 16157     | 16190             |

|             |      |      |   |       |       |
|-------------|------|------|---|-------|-------|
| <b>CA44</b> | 4860 | 97.2 | 5 | 15422 | 15427 |
| <b>CA47</b> | 890  | 17.8 | 1 | 17876 | 17877 |
| <b>CA49</b> | 0    | 0    | 0 | 17903 | 17903 |
| <b>CA50</b> | 6530 | 13.6 | 8 | 18526 | 18534 |

**Concentration of mutant *KRAS* p. G12V detected in paired FFPE.**

| <b>Patient ID</b> | <b>Concentration of DNA(copies/ml)</b> | <b>Copies/20ul</b> | <b>Positives</b> | <b>Negatives</b> | <b>Accepted Droplets</b> |
|-------------------|----------------------------------------|--------------------|------------------|------------------|--------------------------|
| <b>NTC</b>        | 0                                      | 0                  | 0                | 18450            | 18450                    |
| <b>CA4</b>        | 27000                                  | 540                | 279              | 12039            | 12318                    |
| <b>CA13</b>       | 6900                                   | 138                | 71               | 12019            | 12090                    |
| <b>CA17</b>       | 80                                     | 1.6                | 1                | 15037            | 15038                    |
| <b>CA22</b>       | 1600                                   | 32                 | 16               | 11645            | 11661                    |
| <b>CA31</b>       | 10300                                  | 206                | 16               | 12107            | 12213                    |
| <b>CA34</b>       | 1800                                   | 36                 | 22               | 14489            | 14511                    |
| <b>CA44</b>       | 760                                    | 15.2               | 1                | 18154            | 18155                    |
| <b>CA47</b>       | 5380                                   | 107.6              | 6                | 16613            | 16619                    |
| <b>CA49</b>       | 1790                                   | 35.8               | 2                | 16402            | 16404                    |
| <b>CA50</b>       | 860                                    | 15.2               | 1                | 19023            | 19024                    |

**Table S3. Concentration of mutant *KRAS* multiplex detected in paired plasma.**

| <b>Patient ID</b> | <b>Concentration of DNA (copies/ml)</b> | <b>Copies/20ul</b> | <b>Positives</b> | <b>Negatives</b> | <b>Accepted Droplets</b> | <b>Allele frequency (%)</b> |
|-------------------|-----------------------------------------|--------------------|------------------|------------------|--------------------------|-----------------------------|
| <b>NTC</b>        | 0                                       | 0                  | 0                | 16390            | 16390                    | 0                           |
| <b>NL1</b>        | 0                                       | 0                  | 0                | 17796            | 7796                     | 0                           |
| <b>NL2</b>        | 0                                       | 0                  | 0                | 16218            | 16218                    | 0                           |
| <b>CA1</b>        | 0                                       | 0                  | 0                | 18555            | 18555                    | 0                           |
| <b>CA17</b>       | 0                                       | 0                  | 0                | 20111            | 20111                    | 0                           |
| <b>CA21</b>       | 60                                      | 1.2                | 0                | 19051            | 19052                    | 0                           |
| <b>CA22</b>       | 0                                       | 0                  | 0                | 18394            | 18394                    | 0                           |
| <b>CA29</b>       | 0                                       | 0                  | 0                | 15289            | 15289                    | 0                           |
| <b>CA30</b>       | 70                                      | 1.4                | 1                | 19051            | 19052                    | 7.692                       |
| <b>CA31</b>       | 0                                       | 0                  | 0                | 15971            | 15971                    | 0                           |
| <b>CA32</b>       | 0                                       | 0                  | 0                | 17916            | 17916                    | 0                           |
| <b>CA34</b>       | 0                                       | 0                  | 0                | 18310            | 18310                    | 0                           |
| <b>CA38</b>       | 0                                       | 0                  | 0                | 16676            | 16676                    | 0                           |
| <b>CA39</b>       | 0                                       | 0                  | 0                | 19055            | 19055                    | 0                           |
| <b>CA44</b>       | 0                                       | 0                  | 0                | 17088            | 17088                    | 0                           |
| <b>CA46</b>       | 0                                       | 0                  | 0                | 18040            | 18040                    | 0                           |
| <b>CA47</b>       | 0                                       | 0                  | 0                | 16461            | 16461                    | 0                           |
| <b>CA49</b>       | 70                                      | 1.4                | 1                | 16832            | 16833                    | 1.030                       |
| <b>CA50</b>       | 0                                       | 0                  | 0                | 16138            | 16138                    | 0                           |

**Concentration of mutant *KRAS* p. G12D detected in paired plasma.**

| Patient ID | Concentration of DNA(copies/ml) | Copies/20ul | Positives | Negatives | Accepted Droplets |
|------------|---------------------------------|-------------|-----------|-----------|-------------------|
| NTC        | 0                               | 0           | 0         | 15286     | 15286             |
| CA21       | 0                               | 0           | 0         | 16386     | 16387             |
| CA30       | 70                              | 1.4         | 1         | 19337     | 19337             |
| CA49       | 0                               | 0           | 0         | 15286     | 15286             |

**Concentration of mutant *KRAS* p. G12V detected in paired plasma.**

| Patient ID | Concentration of DNA(copies/ml) | Copies/20ul | Positives | Negatives | Accepted Droplets |
|------------|---------------------------------|-------------|-----------|-----------|-------------------|
| NTC        | 0                               | 0           | 0         | 13728     | 13728             |
| CA21       | 60                              | 1.2         | 1         | 20320     | 20321             |
| CA30       | 60                              | 1.2         | 1         | 19707     | 19708             |
| CA49       | 70                              | 1.4         | 1         | 16786     | 16787             |

**Table S4. *KRAS*-associated signaling oncogenes, including *RAS* and *RAF*, with transcripts per million read (TPM) values for the bile, tissue, and plasma samples ('0' indicates that TPM > 10).**

| Gene_Symbol | Description                                     | Bile_mRNA | Tissue_mRNA | Plasma_mRNA |
|-------------|-------------------------------------------------|-----------|-------------|-------------|
| MRAS        | muscle RAS oncogene homolog                     | 0         | -           | -           |
| RAB10       | RAB10, member RAS oncogene family               | 0         | 0           | 0           |
| RAB11A      | RAB11A, member RAS oncogene family              | 0         | 0           | 0           |
| RAB11B      | RAB11B, member RAS oncogene family              | 0         | 0           | 0           |
| RAB12       | RAB12, member RAS oncogene family               | 0         | 0           | -           |
| RAB13       | RAB13, member RAS oncogene family               | 0         | 0           | 0           |
| RAB14       | RAB14, member RAS oncogene family               | 0         | 0           | 0           |
| RAB15       | RAB15, member RAS oncogene family               | 0         | -           | -           |
| RAB17       | RAB17, member RAS oncogene family               | 0         | 0           | -           |
| RAB18       | RAB18, member RAS oncogene family               | 0         | 0           | 0           |
| RAB1A       | RAB1A, member RAS oncogene family               | 0         | 0           | 0           |
| RAB1B       | RAB1B, member RAS oncogene family               | 0         | 0           | -           |
| RAB20       | RAB20, member RAS oncogene family               | 0         | 0           | -           |
| RAB21       | RAB21, member RAS oncogene family               | 0         | 0           | 0           |
| RAB22A      | RAB22A, member RAS oncogene family              | 0         | 0           | -           |
| RAB24       | RAB24, member RAS oncogene family               | 0         | 0           | 0           |
| RAB25       | RAB25, member RAS oncogene family               | 0         | 0           | -           |
| RAB26       | RAB26, member RAS oncogene family               | 0         | -           | -           |
| RAB27A      | RAB27A, member RAS oncogene family              | 0         | 0           | 0           |
| RAB27B      | RAB27B, member RAS oncogene family              | 0         | 0           | 0           |
| RAB28       | RAB28, member RAS oncogene family               | 0         | 0           | -           |
| RAB29       | RAB29, member RAS oncogene family               | 0         | -           | -           |
| RAB2A       | RAB2A, member RAS oncogene family               | 0         | 0           | 0           |
| RAB2B       | RAB2B, member RAS oncogene family               | 0         | 0           | -           |
| RAB30       | RAB30, member RAS oncogene family               | 0         | -           | 0           |
| RAB31       | RAB31, member RAS oncogene family               | 0         | 0           | 0           |
| RAB32       | RAB32, member RAS oncogene family               | 0         | -           | 0           |
| RAB33A      | RAB33A, member RAS oncogene family              | 0         | -           | 0           |
| RAB33B      | RAB33B, member RAS oncogene family              | 0         | 0           | -           |
| RAB34       | RAB34, member RAS oncogene family               | 0         | 0           | -           |
| RAB35       | RAB35, member RAS oncogene family               | 0         | 0           | 0           |
| RAB36       | RAB36, member RAS oncogene family               | 0         | -           | -           |
| RAB37       | RAB37, member RAS oncogene family               | 0         | -           | -           |
| RAB38       | RAB38, member RAS oncogene family               | 0         | -           | 0           |
| RAB39A      | RAB39A, member RAS oncogene family              | 0         | -           | -           |
| RAB3A       | RAB3A, member RAS oncogene family               | 0         | -           | 0           |
| RAB3B       | RAB3B, member RAS oncogene family               | 0         | -           | -           |
| RAB3D       | RAB3D, member RAS oncogene family               | 0         | 0           | -           |
| RAB40A      | RAB40A, member RAS oncogene family              | 0         | -           | -           |
| RAB40B      | RAB40B, member RAS oncogene family              | 0         | -           | -           |
| RAB40C      | RAB40C, member RAS oncogene family              | 0         | -           | -           |
| RAB42       | RAB42, member RAS oncogene family               | 0         | -           | -           |
| RAB42P1     | RAB42, member RAS oncogene family, pseudogene 1 | 0         | -           | -           |
| RAB43       | RAB43, member RAS oncogene family               | 0         | -           | -           |
| RAB44       | RAB44, member RAS oncogene family               | 0         | -           | -           |
| RAB4A       | RAB4A, member RAS oncogene family               | 0         | 0           | 0           |
| RAB4B       | RAB4B, member RAS oncogene family               | 0         | -           | 0           |
| RAB5A       | RAB5A, member RAS oncogene family               | 0         | 0           | 0           |
| RAB5B       | RAB5B, member RAS oncogene family               | 0         | 0           | 0           |
| RAB5C       | RAB5C, member RAS oncogene family               | 0         | 0           | 0           |
| RAB6A       | RAB6A, member RAS oncogene family               | 0         | 0           | 0           |
| RAB6B       | RAB6B, member RAS oncogene family               | 0         | -           | 0           |
| RAB6C       | RAB6C, member RAS oncogene family               | 0         | -           | -           |
| RAB7A       | RAB7A, member RAS oncogene family               | 0         | 0           | 0           |
| RAB8A       | RAB8A, member RAS oncogene family               | 0         | 0           | 0           |
| RAB8B       | RAB8B, member RAS oncogene family               | 0         | 0           | 0           |
| RABL2A      | RAB, member of RAS oncogene family like 2A      | 0         | -           | -           |
| RABL2B      | RAB, member of RAS oncogene family like 2B      | 0         | -           | -           |
| RABL3       | RAB, member of RAS oncogene family like 3       | 0         | -           | -           |
| RABL6       | RAB, member RAS oncogene family like 6          | 0         | 0           | 0           |
| RAN         | RAN, member RAS oncogene family                 | 0         | 0           | 0           |
| RAP1A       | RAP1A, member of RAS oncogene family            | 0         | 0           | 0           |
| RAP1B       | RAP1B, member of RAS oncogene family            | 0         | -           | 0           |
| RAP2A       | RAP2A, member of RAS oncogene family            | 0         | 0           | 0           |
| RAP2B       | RAP2B, member of RAS oncogene family            | 0         | 0           | 0           |
| RAP2C       | RAP2C, member of RAS oncogene family            | 0         | 0           | -           |

Figure S1. mutant *KRAS* multiplex in bile, FFPE, plasma

<Bile>

- mutant *KRAS* multiplex detected in CBD bile

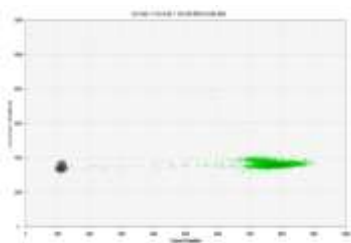

<NL7>

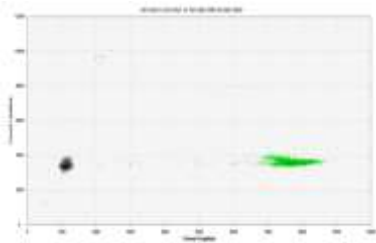

<NL12>

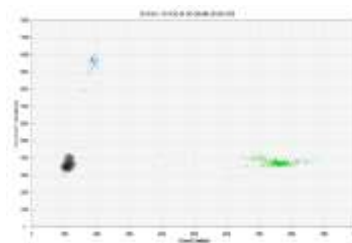

<NL13-1>

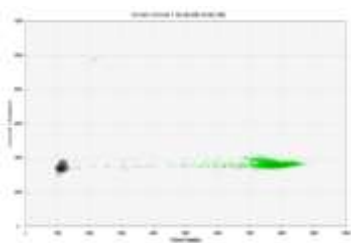

<NL16-1>

- mutant *KRAS* multiplex detected in BTC bile.

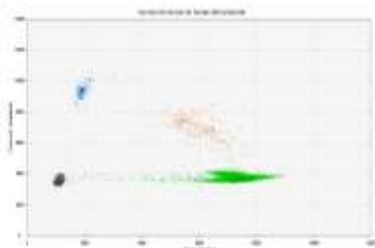

<CA2-2>

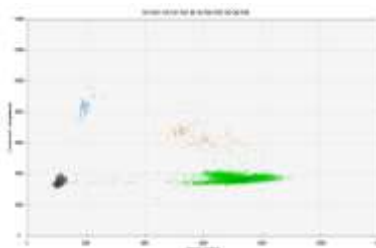

<CA7>

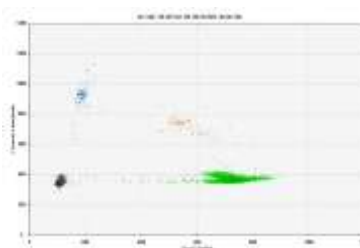

<CA9>

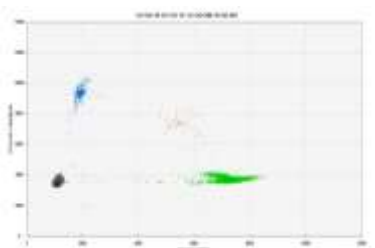

<CA12>

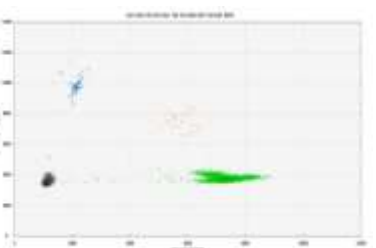

<CA18-1>

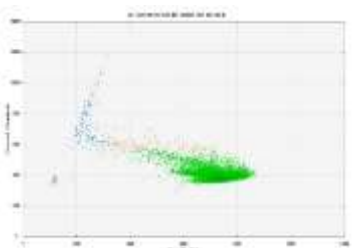

<CA27>

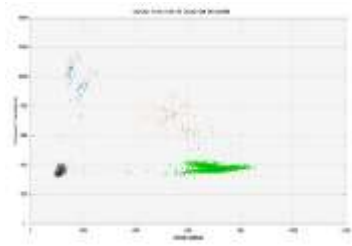

<CA28>

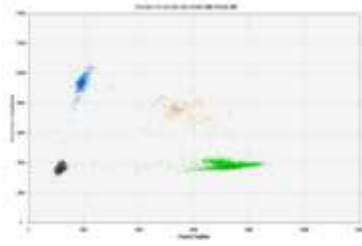

<CA34>

### <FFPE>

- mutant *KRAS* multiplex detected in non-tumor area of FFPE.

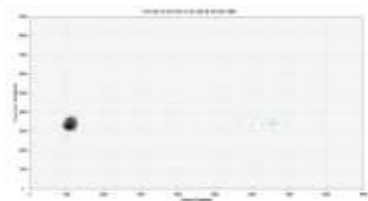

<NL2>

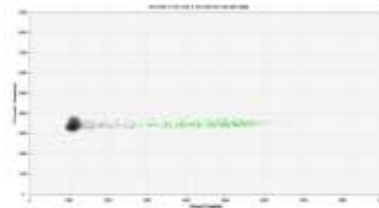

<NL3>

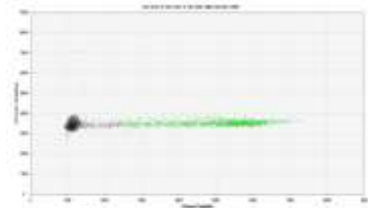

<NL4>

- mutant *KRAS* multiplex detected in BTC FFPE.

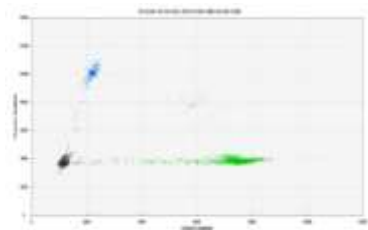

<CA4>

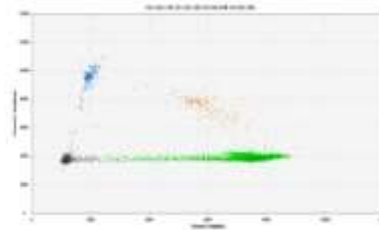

<CA13>

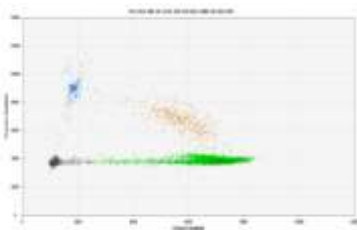

<CA22>

### <Plasma>

mutant *KRAS* multiplex detected in control plasma.



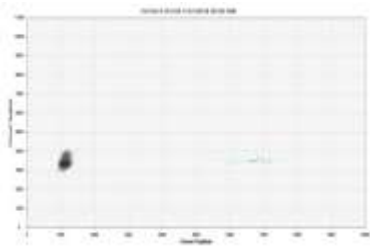

<NL1>

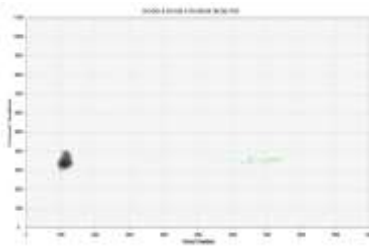

<NL2>

- mutant *KRAS* multiplex detected in BTC plasma.

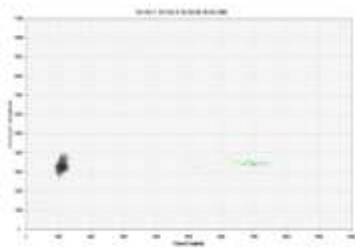

<CA21>

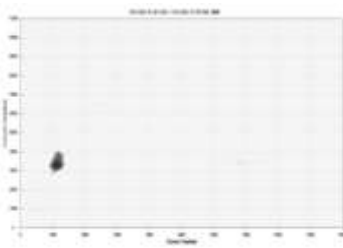

<CA30>

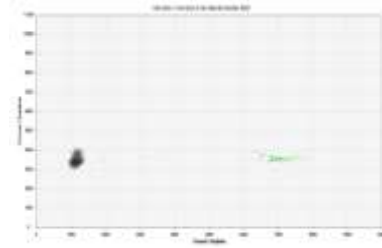

<CA49>
